# Supplementary material
Source: publisher figshare collection journal article supplement (https://acs.figshare.com/ndownloader/files/13534229)
Supplement: Supplementary file 1 [file 13534229]

## Supporting Information

# **Photochemical Rescue of a Conformationally Inactivated Ribonucleotide Reductase**

Brandon L. Greene,<sup>a</sup> JoAnne Stubbe<sup>b,c,\*</sup> and Daniel G. Nocera<sup>a,\*</sup>

<sup>a</sup> *Department of Chemistry and Chemical Biology, Harvard University, Cambridge, MA USA 02138.*

<sup>b</sup> *Department of Chemistry and* <sup>c</sup>*Department of Biology, Massachusetts Institute of Technology, Cambridge, MA USA 02139.*

Email: [dnocera@fas.harvard.edu](mailto:dnocera@fas.harvard.edu); [stubbe@mit.edu](mailto:stubbe@mit.edu)

| <i>Table of Contents</i>                                                                                                                                                | <i>Page</i> |
|-------------------------------------------------------------------------------------------------------------------------------------------------------------------------|-------------|
| Materials                                                                                                                                                               | S2          |
| Methods                                                                                                                                                                 | S2          |
| <b>Figure S1.</b> Example [ReI] <sup>+</sup> emission lifetime trace and associated fit.                                                                                | S3          |
| <b>Figure S2.</b> pH dependent photochemical turnover assay.                                                                                                            | S4          |
| <b>Figure S3.</b> pH dependent transient absorption spectra of E <sub>350</sub> Q:Y <sub>356</sub> F <sub>2</sub> Y-photoβ <sub>2</sub> .                               | S5          |
| <b>Table S1.</b> Y <sub>356</sub> F <sub>2</sub> Y-photoβ <sub>2</sub> and E <sub>350</sub> Q:Y <sub>356</sub> F <sub>2</sub> Y-photoβ <sub>2</sub> emission lifetimes. | S6          |
| <b>Figure S4.</b> Proposed model for E <sub>52</sub> allosteric regulation.                                                                                             | S7          |
| References                                                                                                                                                              | S8          |

## Materials

(His)<sub>6</sub>-WT  $\alpha_2$  (specific activity of 2,100 nmol/min/mg), (His)<sub>6</sub>-Y<sub>731</sub>F  $\alpha_2$ , WT  $\beta_2$  (1.1 Y•/ $\beta_2$ , specific activity of 5,800 nmol/min/mg), photo $\beta_2$  (C<sub>268</sub>S:C<sub>305</sub>S:S<sub>355</sub>C- $\beta_2$ , [Re<sup>I</sup>]-ligated), and Y<sub>356</sub>F-photo $\beta_2$  (C<sub>268</sub>S:C<sub>305</sub>S:S<sub>355</sub>C:Y<sub>356</sub>F, [Re<sup>I</sup>]-ligated) were available from a previous study.[1] Primers 5'-CCGCAG**CA**AGTGGAAGTCAGT-3' and 5'-CAACGAGGCGTCGTT**CAC**CTT-3' (forward and reverse, respectively, the bold nucleotide represents the site of mutation) were used for all site directed mutagenesis experiments generating the corresponding E<sub>350</sub>Q mutations in photo $\beta_2$ s and were purchased from Integrative DNA Technologies, Inc. Thioredoxin (TR, 40  $\mu$ mol/min/mg) and thioredoxin reductase (TRR, 1800  $\mu$ mol/min/mg) were available from a previous study [1,2]. 4-(2-Hydroxyethyl)-1-piperazineethanesulfonic acid (HEPES), 2-(N-morpholino)ethanesulfonic acid (MES), anhydrous magnesium sulfate (MgSO<sub>4</sub>), ethylenediaminetetraacetic acid (EDTA), adenosine-5'-triphosphate (ATP), cytidine-5'-diphosphate (CDP), hydroxyurea (HU), ruthenium hexamine dichloride, kanamycin (Km), chloramphenicol (Cm), 2xYT media, M9 minimal salts, L-arabinose (ara),  $\beta$ -mercaptoethanol ( $\beta$ -ME), streptomycin sulfate, and pyridoxal phosphate (PLP) were purchased from Sigma-Aldrich. Dithiothreitol (DTT) and isopropyl- $\beta$ -thiogalacto-pyranoside (IPTG) were purchased from Promega Inc. Tricarbonyl(1,10-phenanthroline)-(4-bromomethylpyridine)rhenium(I) hexafluorophosphate ([Re]-Br) was available from a previous study [3].

## Methods

*Site directed mutagenesis.* Genes encoding *Escherichia coli* E<sub>350</sub>Q:C<sub>268</sub>S:C<sub>305</sub>S:S<sub>355</sub>C-*nrdB* (E<sub>350</sub>Q-photo $\beta_2$ ), E<sub>350</sub>Q:C<sub>268</sub>S:C<sub>305</sub>S:S<sub>355</sub>C:Y<sub>356</sub>F-*nrdB* and E<sub>350</sub>Q:C<sub>268</sub>S:C<sub>305</sub>S:S<sub>355</sub>C:Y<sub>356</sub>Z-*nrdB* (where Z indicates the amber stop codon) were constructed by site directed mutagenesis using the corresponding pBAD photo $\beta_2$ , Y<sub>356</sub>F-photo $\beta_2$ , and Y<sub>356</sub>Z-photo $\beta_2$  plasmids as templates. PCR products were transformed into XL10 Gold cells, and twice plated onto 100  $\mu$ g/mL Ampicillin supplemented LB-agar plates. A single colony was selected for growth and the plasmid was isolated by the Qiagen mini-prep kit and sequenced by Quintara Biosciences.

*Protein expression and purification.* pBAD *nrdB* plasmids were transformed into Top10 cells, and cell growth, protein purification, and [Re<sup>I</sup>]-Br ligation were performed as previously described [1,3]. Expression of the E<sub>350</sub>Q:Y<sub>356</sub>F<sub>2</sub>Y-photo $\beta_2$  resulted in ~50% F<sub>2</sub>Y incorporation (suppression) over truncation and was purified to >85% ( $\beta_2$ ) as determined by SDS-PAGE relative to the homo- and hetero-truncation products ( $\beta_2^$  and  $\beta_2^$  respectively, where  $\beta_2^$  indicates truncated  $\beta$  at the amber codon). The native Y<sub>122</sub>• in all photo $\beta_2$  constructs (>0.8 Y•/ $\beta_2$ ) was reduced with hydroxyurea prior to all experiments.

*3,5-Difluorotyrosine synthesis.* 3,5-F<sub>2</sub>Y was synthesized enzymatically from 2,6-difluorophenol via tyrosine phenol lyase (TPL) as previously described [4].

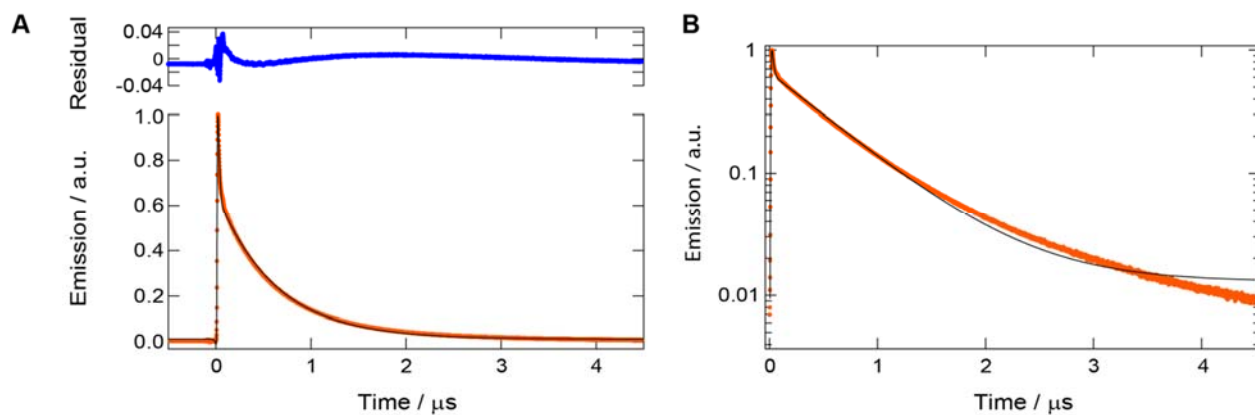

**Figure S1 | A** Emission trace (orange) for E<sub>350</sub>Q-photo $\beta_2$  in complex with WT  $\alpha_2$  and associated fit to an instrument response and mono-exponential decay function (black). Samples contain 2  $\mu\text{M}$  E<sub>350</sub>Q-photo $\beta_2$ , 5  $\mu\text{M}$  WT  $\alpha_2$ , 1 mM CDP and 3 mM ATP in assay buffer, and data represent the average of 150 individual traces ( $3 \times 50$ ). The associated residual trace (data – fit) shown in upper panel (blue). **B** Data presented in panel A viewed on a logarithmic emission intensity scale.

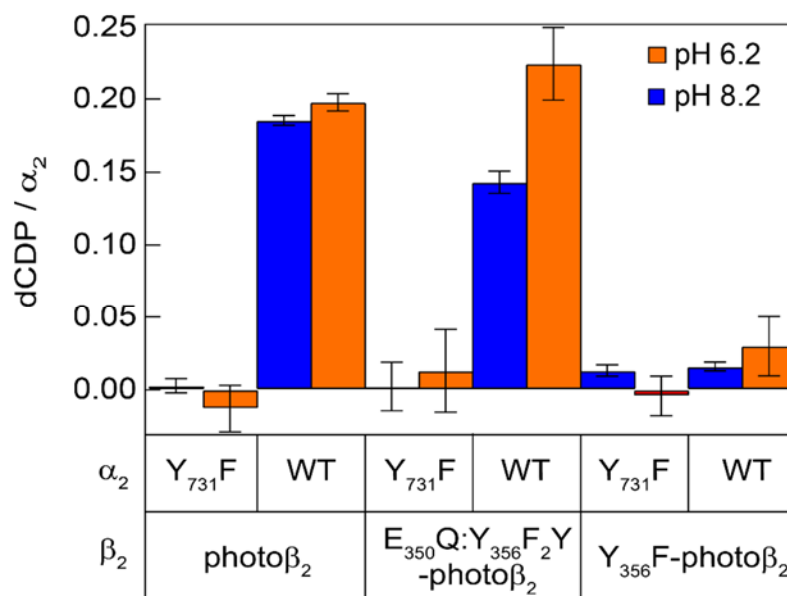

**Figure S2.** pH dependent photochemical turnover assay of E<sub>350</sub>Q:Y<sub>356</sub>F<sub>2</sub>Y-photo $\beta_2$ , photo $\beta_2$  and Y<sub>356</sub>F-photo $\beta_2$ . Photochemical turnover assays performed at pH 6.2 (orange) and 8.2 (blue) with 10  $\mu$ M  $\alpha_2$ , 20  $\mu$ M -photo $\beta_2$ , 0.2 mM [<sup>3</sup>H]-CDP (32,000 cpm/nmol), 3 mM ATP, 10 mM Ru(NH<sub>3</sub>)<sub>6</sub>Cl<sub>3</sub> in 50 mM MOPS, 50 mM HEPES, 15 mM MgSO<sub>4</sub>, 1 mM EDTA, and 5% glycerol. Samples illuminated by a 150 W Xe arc lamp equipped with a  $\lambda > 320$  nm long pass cutoff filter for 4 minutes at room temperature. Error bars represent one standard deviation among triplicate measurements. A dark reaction performed otherwise identically (photo $\beta_2$ /WT  $\alpha_2$ ) served as the background reference.

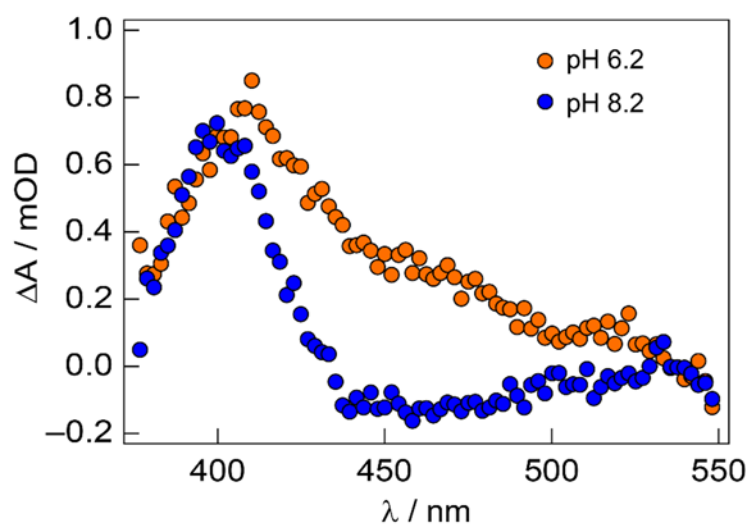

**Figure S3.** pH dependent transient absorption spectra of E<sub>350</sub>Q:Y<sub>356</sub>F<sub>2</sub>Y-photoβ<sub>2</sub>. Spectra collected identically as in the main text with the exception of the supporting buffer which was identical to that used in the generation of Figure S2 and adjusted to pH 6.2 (orange) or 8.2 (blue). Spectra represent the average of three independent experiments corresponding to 1000 laser exposures each.

**Table S1.** Y<sub>356</sub>F<sub>2</sub>Y-photo $\beta_2$  and E<sub>350</sub>Q:Y<sub>356</sub>F<sub>2</sub>Y-photo $\beta_2$  emission lifetimes. Error represents one standard deviation among three independent measurements.  $k_{CS}$  rates are calculated with eq (3), where  $k_0$  is taken as the Y<sub>356</sub>F-photo $\beta_2$ /Y<sub>731</sub>F  $\alpha_2$  complex [Re<sup>I</sup>]<sup>\*</sup> emission lifetime of 680(5) ns. Y<sub>356</sub>F<sub>2</sub>Y-photo $\beta_2$  was available from a previous study [5].

| $\alpha_2$         | $\beta_2$                                            | $\tau_{obs}$ (ns) | $k_{CS}$ ( $10^5$ s <sup>-1</sup> ) |
|--------------------|------------------------------------------------------|-------------------|-------------------------------------|
| WT                 | E <sub>350</sub> Q:Y <sub>356</sub> F <sub>2</sub> Y | 558(3)            | 3.2(1)                              |
| Y <sub>731</sub> F | E <sub>350</sub> Q:Y <sub>356</sub> F <sub>2</sub> Y | 580(8)            | 2.5(2)                              |
| WT                 | Y <sub>356</sub> F <sub>2</sub> Y <sup>*</sup>       | 619(6)            | 1.5(2)                              |
| Y <sub>731</sub> F | Y <sub>356</sub> F <sub>2</sub> Y <sup>*</sup>       | 629(7)            | 1.2(2)                              |

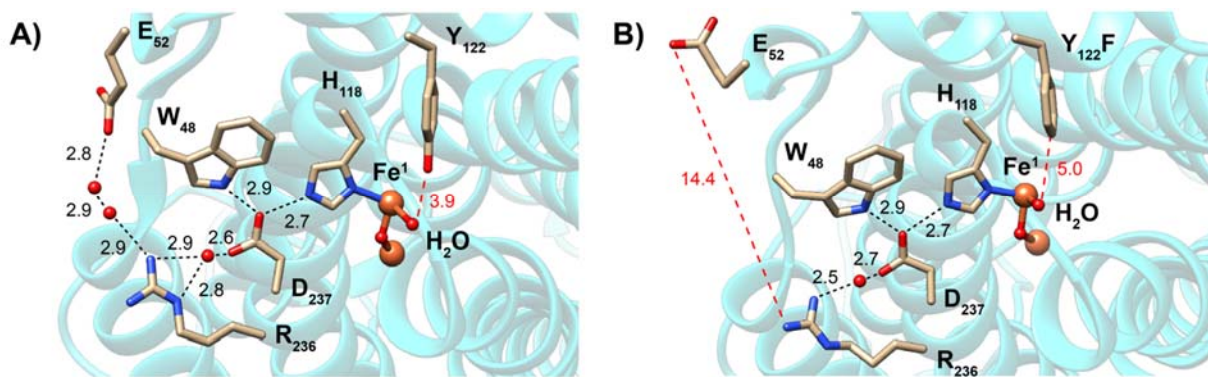

**Figure S4.** H-bonding network connecting E<sub>52</sub> to Y<sub>122</sub> in the  $\beta_2$  subunit of *E. coli* class 1a RNR in both (A) "in" and (B) "out" conformations. The  $\beta$  ribbon structure is shown in cyan, and essential residue sidechains and the Fe<sub>2</sub>O cofactor (with Fe<sup>1</sup> bound H<sub>2</sub>O ligand) are colored by element; carbon, tan; nitrogen, blue; oxygen, red; iron, orange. Putative H-bonds shown in dashed black lines with distances reported in Å, and other relevant distances shown as dashed red lines. The "in" conformation (PDB 5CI4) displays two conserved water molecules bridging E<sub>52</sub> to R<sub>236</sub>, whereas in the "out" conformation (PDB 2AV8, a Y<sub>122</sub>F mutant  $\beta_2$ ) this water network is lost and E<sub>52</sub> approaches the proposed interface with  $\alpha_2$ .



## References

- [1] Greene, B. L.; Taguchi, A. T.; Stubbe, J.; Nocera, D. G. Conformationally dynamic radical transfer in ribonucleotide reductase. *J. Am. Chem. Soc.* **2017**, *139*, 16657–16665.
- [2] Lin, Q.; Parker, M. J.; Taguchi, A. T.; Ravichandran, K.; Kim, A.; Kang, G.; Shao, J.; Drennan, C. L.; Stubbe, J. Glutamate 52- $\beta$  at the  $\alpha/\beta$  subunit interface of *Escherichia coli* class Ia ribonucleotide reductase is essential for conformational gating of radical transfer. *J. Biol. Chem.* **2017**, *292*, 9229–9239.
- [3] Pizano, A. A.; Lutterman, D. A.; Holder, P. G.; Teets, T. S.; Stubbe, J.; Nocera, D. G. Photo-ribonucleotide reductase  $\beta_2$  by selective cysteine labelling with a radical phototrigger. *Proc. Natl. Acad. Sci. U.S.A.* **2012**, *109*, 39–43.
- [4] Seyedsayamdost, M. R.; Yee, C. S.; Stubbe, J. Site-specific incorporation of fluorotyrosines into the R2 subunit of *E. coli* ribonucleotide reductase by expressed protein ligation. *Nat. Protoc.* **2007**, *2*, 1225–1235.
- [5] Olshansky, L.; Stubbe, J.; Nocera, D. G. Charge-transfer dynamics at the  $\alpha/\beta$  subunit interface of a photochemical ribonucleotide reductase. *J. Am. Chem. Soc.* **2016**, *138*, 1196–1205.
